# Supplementary material for: Chemical Characterization and Evaluation of Antimicrobial Properties of the Wild Medicinal Mushroom Ganoderma lucidum Growing in Northern Moroccan Forests
Source: MDPI journal article supplement (doi:10.3390/life13051217), 2023-05-19
Supplement: s1 [file s1]

## Supplementary File

# Chemical Characterization and Evaluation of Antimicrobial Properties of the Wild Medicinal Mushroom *Ganoderma lucidum* Growing in Northern Moroccan Forests.

El Hadi Erbiai <sup>1,2</sup>, Benoutman Amina <sup>1</sup>, Abbassi Kaoutar <sup>1</sup>, Rabah Saidi <sup>1</sup>, Zouhaire Lamrani <sup>1</sup>, Eugénia Pinto <sup>3,4</sup>, Joaquim C.G. Esteves da Silva <sup>2</sup>, Abdelfettah Maouni <sup>1</sup>, and Luís Pinto da Silva <sup>2\*</sup>

<sup>1</sup> Biology, Environment, and Sustainable Development Laboratory, ENS, Abdelmalek Essaadi University, 93000 Tetouan, Morocco; elhadi.erbai@etu.uae.ac.ma (E.H.E.); amina.benoutman@etu.uae.ac.ma; kaoutar.abbassi@etu.uae.ac.ma; r.saidi@uae.ac.ma (R.S.); zh.amrani@yahoo.fr (Z.L.); amaouni@uae.ac.ma (A.M.)

<sup>2</sup> Chemistry Research Unit (CIQUP), Institute of Molecular Sciences (IMS), Department of Sciences, Environment and Territorial Planning, Faculty of Sciences, University of Porto, Rua do Campo Alegre s/n, 4169-007 Porto, Portugal; el.erbai@fc.up.pt (E.H.E.); jcsilva@fc.up.pt (J.C.G.E.d.S.)

<sup>3</sup> Laboratory of Microbiology, Biological Sciences Department, Faculty of Pharmacy, University of Porto (FFUP), 4050-313 Porto, Portugal; epinto@ff.up.pt (E.P.)

<sup>4</sup> Interdisciplinary Centre of Marine and Environmental Research (CIIMAR), University of Porto, 4450-208 Matosinhos, Portugal

\* Correspondence: luis.silva@fc.up.pt (L.P.d.S.)

**Citation:** Erbiai, E.H.; Amina, B.; Kaoutar, A.; Saidi, R.; Lamrani, Z.; Pinto, E.; Esteves da Silva, J.C.G.; Maouni, A.; Pinto da Silva, L. Chemical Characterization and Evaluation of Antimicrobial Properties of the Wild Medicinal Mushroom *Ganoderma lucidum* Growing in Northern Moroccan Forests. *Life* **2023**, *13*, 1217. <https://doi.org/10.3390/life13051217>

Academic Editor: Stefania Lamponi

Received: 29 March 2023

Revised: 15 May 2023

Accepted: 17 May 2023

Published: 19 May 2023

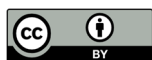

**Copyright:** © 2023 by the authors. Submitted for possible open access publication under the terms and conditions of the Creative Commons Attribution (CC BY) license (<https://creativecommons.org/licenses/by/4.0/>).

**Table S1:** Sugar compositions of the derivatized methanolic extract of *Ganoderma lucidum* by GC–MS analysis.

| Compound names                      | Chemical formula                                  | Molecular weight | Kovats' RI*    | Area %      |
|-------------------------------------|---------------------------------------------------|------------------|----------------|-------------|
| 1,5-Anhydrohexitol                  | C <sub>6</sub> H <sub>12</sub> O <sub>5</sub>     | 164.16           | 1989.85        | 1.52        |
| 1-Deoxy-d-ribitol                   | C <sub>5</sub> H <sub>12</sub> O <sub>4</sub>     | 136.15           | 1533.83        | 0.35        |
| D-Allofuranose                      | C <sub>6</sub> H <sub>12</sub> O <sub>6</sub>     | 180.16           | 1996.64        | 1.19        |
| D-Arabinitol                        | C <sub>5</sub> H <sub>12</sub> O <sub>5</sub>     | 152.15           | 1710.45        | 0.28        |
| D-Erythrofuranose (isomer 2)        | C <sub>4</sub> H <sub>8</sub> O <sub>4</sub>      | 120.10           | 1833.33        | 0.27        |
| D-Fructofuranose (isomer 1)         | C <sub>6</sub> H <sub>12</sub> O <sub>6</sub>     | 180.16           | 2155.17        | 0.69        |
| D-Gluconic acid                     | C <sub>6</sub> H <sub>12</sub> O <sub>7</sub>     | 196.16           | 2017.01        | 0.79        |
| D-Glucopyranosiduronic acid         | -                                                 | -                | 3090.24        | 0.33        |
| DL-Arabinopyranose                  | C <sub>5</sub> H <sub>10</sub> O <sub>5</sub>     | 150.13           | 1993.62        | 0.22        |
| D-Ribofuranose (isomer 1)           | C <sub>5</sub> H <sub>10</sub> O <sub>5</sub>     | 150.13           | 2665.19        | 0.52        |
| D-Ribono-1,4-lactone                | C <sub>5</sub> H <sub>8</sub> O <sub>5</sub>      | 148.11           | 1634.80        | 0.13        |
| D-Talofuranose (isomer 2)           | C <sub>6</sub> H <sub>12</sub> O <sub>6</sub>     | 180.16           | 1788.03        | 0.24        |
| <b>Galactitol</b>                   | <b>C<sub>6</sub>H<sub>14</sub>O<sub>6</sub></b>   | <b>182.17</b>    | <b>1991.19</b> | <b>5.56</b> |
| Gluconolactone                      | C <sub>6</sub> H <sub>10</sub> O <sub>6</sub>     | 178.14           | 1777.31        | 0.32        |
| Glyceric acid                       | C <sub>3</sub> H <sub>6</sub> O <sub>4</sub>      | 106.08           | 1318.28        | 0.27        |
| Glycerol                            | C <sub>3</sub> H <sub>8</sub> O <sub>3</sub>      | 92.09            | 1260.23        | 2.31        |
| Lactulose (isomer 2)                | C <sub>12</sub> H <sub>22</sub> O <sub>11</sub>   | 342.30           | 2777.84        | 2.69        |
| L-Arabinose                         | C <sub>5</sub> H <sub>10</sub> O <sub>5</sub>     | 150.13           | 1781.42        | 0.34        |
| L-Sorbose                           | C <sub>6</sub> H <sub>12</sub> O <sub>6</sub>     | 180.16           | 2010.31        | 0.35        |
| Methyl alpha-D-glucofuranoside      | C <sub>7</sub> H <sub>14</sub> O <sub>6</sub>     | 194.18           | 2736.36        | 0.93        |
| Myo-Inositol                        | C <sub>6</sub> H <sub>12</sub> O <sub>6</sub>     | 180.16           | 1952.72        | 2.26        |
| N-Acetyl-D-galactosamine (isomer 2) | C <sub>8</sub> H <sub>15</sub> NO <sub>6</sub>    | 221.21           | 2109.77        | 0.82        |
| Threonic acid                       | C <sub>4</sub> H <sub>8</sub> O <sub>5</sub>      | 136.10           | 1538.81        | 0.11        |
| Trehalose                           | C <sub>12</sub> H <sub>22</sub> O <sub>11</sub>   | 342.30           | 2634.18        | 2.49        |
| <b>Turanose</b>                     | <b>C<sub>12</sub>H<sub>22</sub>O<sub>11</sub></b> | <b>342.30</b>    | <b>2627.85</b> | <b>5.25</b> |
| <b>Xylitol</b>                      | <b>C<sub>5</sub>H<sub>12</sub>O<sub>5</sub></b>   | <b>152.15</b>    | <b>1726.87</b> | <b>7.69</b> |
| <b>α-D-Allopyranose</b>             | <b>C<sub>6</sub>H<sub>12</sub>O<sub>6</sub></b>   | <b>180.16</b>    | <b>1998.07</b> | <b>5.28</b> |
| α-D-Glucopyranose                   | C <sub>6</sub> H <sub>12</sub> O <sub>6</sub>     | 180.16           | 1986.33        | 0.76        |
| α-D-Mannopyranose                   | C <sub>6</sub> H <sub>12</sub> O <sub>6</sub>     | 180.16           | 1650.36        | 0.94        |
| <b>α-D-Talopyranose</b>             | <b>C<sub>6</sub>H<sub>12</sub>O<sub>6</sub></b>   | <b>180.16</b>    | <b>2080.54</b> | <b>4.59</b> |

\*Kovats' RI: Kovats retention index of compound's derivative form.

**Table S2:** Organic acids of the derivatized methanolic extract of *G. lucidum* by GC–MS analysis.

| Compound names           | Chemical formula                               | Molecular weight | Kovats' RI*    | Area %      |
|--------------------------|------------------------------------------------|------------------|----------------|-------------|
| 3-Hydroxyisobutyric acid | C <sub>4</sub> H <sub>8</sub> O <sub>3</sub>   | 104.10           | 1146.99        | 0.06        |
| Carbamic acid            | CH <sub>3</sub> NO <sub>2</sub>                | 61.04            | 1024.84        | 0.27        |
| <b>Citric acid</b>       | <b>C<sub>6</sub>H<sub>8</sub>O<sub>7</sub></b> | <b>192.12</b>    | <b>1820.71</b> | <b>1.31</b> |
| <b>Fumaric Acid</b>      | <b>C<sub>4</sub>H<sub>4</sub>O<sub>4</sub></b> | <b>116.07</b>    | <b>1329.57</b> | <b>1.89</b> |
| Glycolic acid            | C <sub>2</sub> H <sub>4</sub> O <sub>3</sub>   | 76.05            | 1066.46        | 0.12        |
| Lactic Acid              | C <sub>3</sub> H <sub>6</sub> O <sub>3</sub>   | 90.08            | 1053.42        | 0.2         |
| <b>Malic acid</b>        | <b>C<sub>4</sub>H<sub>6</sub>O<sub>5</sub></b> | <b>134.09</b>    | <b>1479.08</b> | <b>3.64</b> |
| Phthalic acid            | C <sub>8</sub> H <sub>6</sub> O <sub>4</sub>   | 166.13           | 2541.45        | 0.42        |
| Pyruvic acid             | C <sub>3</sub> H <sub>4</sub> O <sub>3</sub>   | 88.06            | 1079.50        | 0.11        |
| Succinic acid            | C <sub>4</sub> H <sub>6</sub> O <sub>4</sub>   | 118.09           | 1298.86        | 0.87        |

\*Kovats' RI: Kovats retention index of compound's derivative form.

**Table S3:** Fatty acids of the derivatized methanolic extract of *G. lucidum* by GC–MS analysis.

| Compound names              | Chemical formula                                 | Molecular weight | Kovats' RI*    | Area %      |
|-----------------------------|--------------------------------------------------|------------------|----------------|-------------|
| 10,12-Docosadiynedioic acid | C <sub>22</sub> H <sub>34</sub> O <sub>4</sub>   | 362.50           | 2813.30        | 0.11        |
| 2-Bromosebacic acid         | C <sub>10</sub> H <sub>17</sub> BrO <sub>4</sub> | 281.14           | 2954.77        | 0.30        |
| 2-Hydroxyglutaric acid      | C <sub>5</sub> H <sub>8</sub> O <sub>5</sub>     | 148.11           | 1563.68        | 0.12        |
| <b>Linoleic acid</b>        | <b>C<sub>18</sub>H<sub>32</sub>O<sub>2</sub></b> | <b>280.45</b>    | <b>2197.13</b> | <b>5.13</b> |
| Oleic acid                  | C <sub>18</sub> H <sub>34</sub> O <sub>2</sub>   | 282.46           | 2205.92        | 0.46        |
| Palmitic acid               | C <sub>16</sub> H <sub>32</sub> O <sub>2</sub>   | 256.42           | 2027.84        | 0.92        |
| Pentadecanoic acid          | C <sub>15</sub> H <sub>30</sub> O <sub>2</sub>   | 242.40           | 1988.93        | 0.36        |
| Stearic acid                | C <sub>18</sub> H <sub>36</sub> O <sub>2</sub>   | 284.48           | 2223.08        | 0.35        |

\*Kovats' RI: Kovats retention index of compound's derivative form.

**Table S4:** Amino acids of the derivatized methanolic extract of *G. lucidum* by GC–MS analysis.

| Compound names      | Chemical formula                                | Molecular weight | Kovats' RI*    | Area %      |
|---------------------|-------------------------------------------------|------------------|----------------|-------------|
| Alanine             | C <sub>3</sub> H <sub>7</sub> NO <sub>2</sub>   | 89.09            | 1093.79        | 0.44        |
| Aspartic acid       | C <sub>4</sub> H <sub>7</sub> NO <sub>4</sub>   | 133.10           | 1512.94        | 0.50        |
| Glutamic acid       | C <sub>5</sub> H <sub>9</sub> NO <sub>4</sub>   | 147.13           | 1610.29        | 0.23        |
| Leucine             | C <sub>6</sub> H <sub>13</sub> NO <sub>2</sub>  | 131.17           | 1282.95        | 0.43        |
| <b>Pidolic acid</b> | <b>C<sub>5</sub>H<sub>7</sub>NO<sub>3</sub></b> | <b>129.11</b>    | <b>1524.38</b> | <b>4.72</b> |
| Serine              | C <sub>3</sub> H <sub>7</sub> NO <sub>3</sub>   | 105.09           | 1347.85        | 0.38        |
| Threonine           | C <sub>4</sub> H <sub>9</sub> NO <sub>3</sub>   | 119.12           | 1376.34        | 0.32        |
| Valine              | C <sub>5</sub> H <sub>11</sub> NO <sub>2</sub>  | 117.15           | 1205.11        | 0.42        |

\*Kovats' RI: Kovats retention index of compound's derivative form.

**Table S5:** Steroids of the derivatized methanolic extract of *G. lucidum* by GC–MS analysis.

| Compound names                                  | Chemical formula                               | Molecular weight | Kovats' RI*    | Area %      |
|-------------------------------------------------|------------------------------------------------|------------------|----------------|-------------|
| 16 $\alpha$ -Hydroxypregnenolone                | C <sub>21</sub> H <sub>32</sub> O <sub>3</sub> | 332.50           | 3027.53        | 0.23        |
| <b>Ergosta-7,22-dien-3<math>\beta</math>-ol</b> | <b>C<sub>28</sub>H<sub>46</sub>O</b>           | <b>398.70</b>    | <b>3260.87</b> | <b>3.02</b> |
| Ergosta-7-en-3 $\beta$ -ol                      | C <sub>28</sub> H <sub>48</sub> O              | 400.70           | 3342.53        | 0.52        |
| <b>Ergosterol</b>                               | <b>C<sub>28</sub>H<sub>44</sub>O</b>           | <b>396.65</b>    | <b>3242.78</b> | <b>3.55</b> |

\*Kovats' RI: Kovats retention index of compound's derivative form.

**Table S6:** Polyphenols of the derivatized methanolic extract of *G. lucidum* by GC–MS analysis.

| Compound names                              | Chemical formula                                               | Molecular weight | Kovats' RI*   | Area %      |
|---------------------------------------------|----------------------------------------------------------------|------------------|---------------|-------------|
| 1,1-Dichloro-2,2-bis(4-methoxyphenyl)ethane | C <sub>16</sub> H <sub>16</sub> Cl <sub>2</sub> O <sub>2</sub> | 311.2            | 1217          | 0.22        |
| <b>Benzene, (3-chloro-1-propenyl)-</b>      | <b>C<sub>9</sub>H<sub>9</sub>Cl</b>                            | <b>152.621</b>   | <b>934.18</b> | <b>3.79</b> |
| Flavone, 5,7-dihydroxy-6c-glucoside         | C <sub>27</sub> H <sub>30</sub> O <sub>14</sub>                | 578.5            | 3128.57       | 0.46        |
| Gentisic acid                               | C <sub>7</sub> H <sub>6</sub> O <sub>4</sub>                   | 154.1201         | 1772.14       | 0.65        |
| Phenol                                      | C <sub>6</sub> H <sub>6</sub> O                                | 94.11            | 919.62        | 0.31        |
| Pyrogallol                                  | C <sub>6</sub> H <sub>6</sub> O <sub>3</sub>                   | 126.11           | 1597.01       | 0.49        |

\*Kovats' RI: Kovats retention index of compound's derivative form.

**Table S7:** Other biomolecules group of the derivatized methanolic extract of *G. lucidum* by GC–MS analysis.

| Compound names                     | Chemical formula                                              | Molecular weight | Kovats' RI*    | Area %      |
|------------------------------------|---------------------------------------------------------------|------------------|----------------|-------------|
| 1,5-Pentanediol                    | C <sub>5</sub> H <sub>12</sub> O <sub>2</sub>                 | 104.15           | 1225.57        | 0.21        |
| 2,4-Dimethylthiazole               | C <sub>5</sub> H <sub>7</sub> N <sub>5</sub>                  | 113.18           | 897.42         | 0.03        |
| 2-Monoolein                        | C <sub>21</sub> H <sub>40</sub> O <sub>4</sub>                | 356.50           | 2934.44        | 0.09        |
| 3-Methoxypentane                   | C <sub>6</sub> H <sub>14</sub> O                              | 102.17           | 1730.35        | 0.26        |
| 3-Methyl-5-phenyl-1H-pyrazole      | C <sub>10</sub> H <sub>10</sub> N <sub>2</sub>                | 158.20           | 2210.06        | 0.22        |
| 4-Pyridinol                        | C <sub>5</sub> H <sub>5</sub> NO                              | 95.10            | 1037.27        | 0.11        |
| 6-Undecanol                        | C <sub>11</sub> H <sub>24</sub> O                             | 172.31           | 2616.46        | 0.44        |
| Adenosine                          | C <sub>10</sub> H <sub>13</sub> N <sub>5</sub> O <sub>4</sub> | 267.24           | 2644.30        | 0.31        |
| Deanol                             | C <sub>4</sub> H <sub>11</sub> NO                             | 89.14            | 911.39         | 0.67        |
| Glycerol monostearate              | C <sub>21</sub> H <sub>42</sub> O <sub>4</sub>                | 358.60           | 2764.77        | 0.15        |
| <b>Glycerol-3-phosphate</b>        | <b>C<sub>3</sub>H<sub>9</sub>O<sub>6</sub>P</b>               | <b>172.07</b>    | <b>1764.68</b> | <b>2.63</b> |
| Guanosine                          | C <sub>10</sub> H <sub>13</sub> N <sub>5</sub> O <sub>5</sub> | 283.24           | 2785.80        | 0.15        |
| <b>Phosphoric acid</b>             | <b>H<sub>3</sub>PO<sub>4</sub></b>                            | <b>97.99</b>     | <b>1267.05</b> | <b>5.7</b>  |
| <b>Prostaglandin D<sub>2</sub></b> | <b>C<sub>20</sub>H<sub>32</sub>O<sub>5</sub></b>              | <b>352.47</b>    | <b>3078.05</b> | <b>2.19</b> |

\*Kovats' RI: Kovats retention index of compound's derivative form.

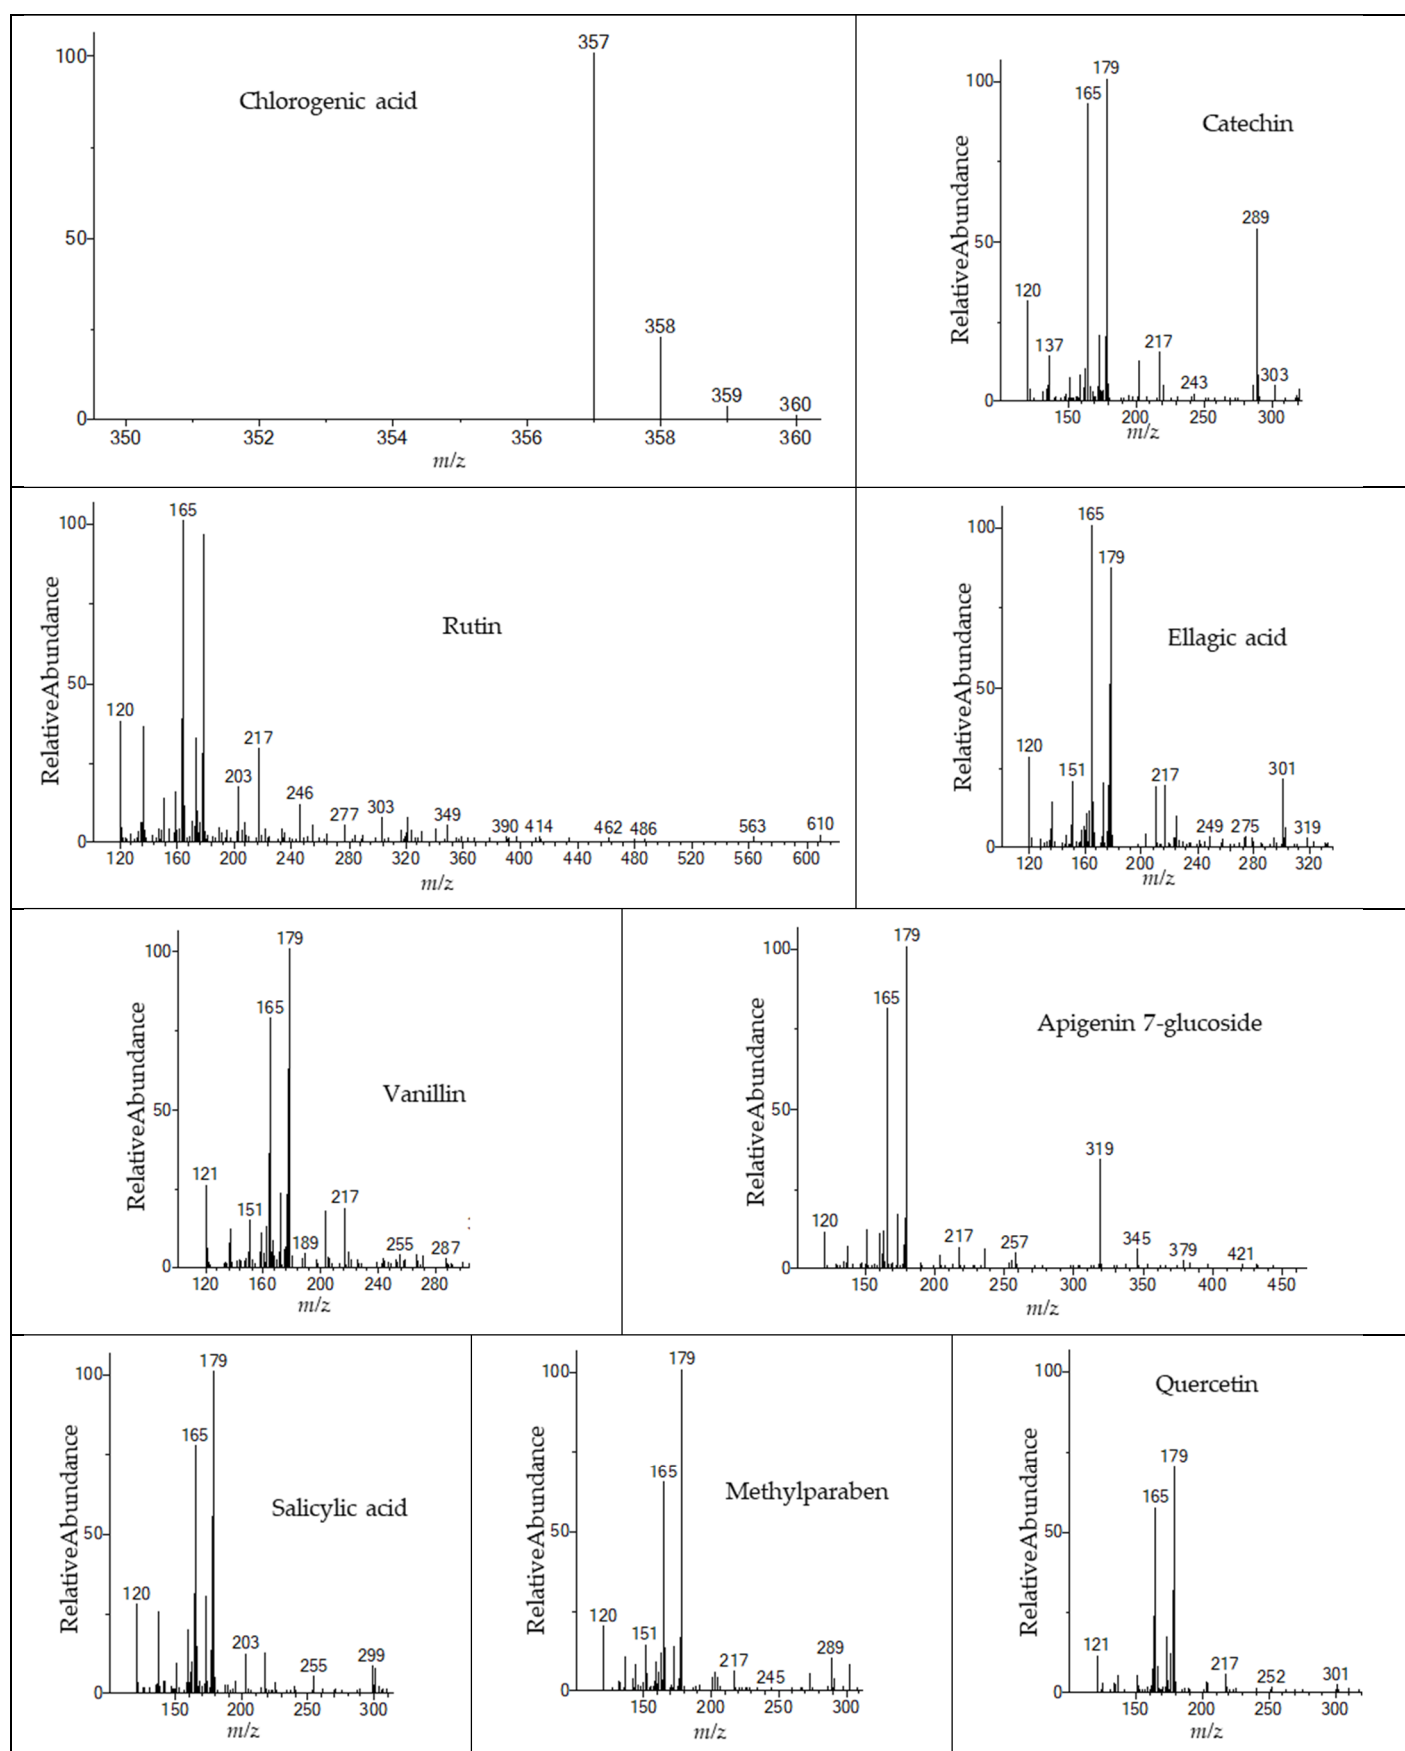

**Figure S1:** ESI-MS<sup>n</sup> spectrum of the most important phenolic compounds identified in *G. lucidum*: Chlorogenic acid at  $m/z$  353.14, catechin at  $m/z$  289.11, rutin at  $m/z$  609.98, ellagic acid at  $m/z$  301.22, vanillin at  $m/z$  151.27, apigenin 7-glucoside at  $m/z$  432.02, salicylic acid at  $m/z$  137.36, methylparaben at  $m/z$  151.20 and quercetin at  $m/z$  301.49.

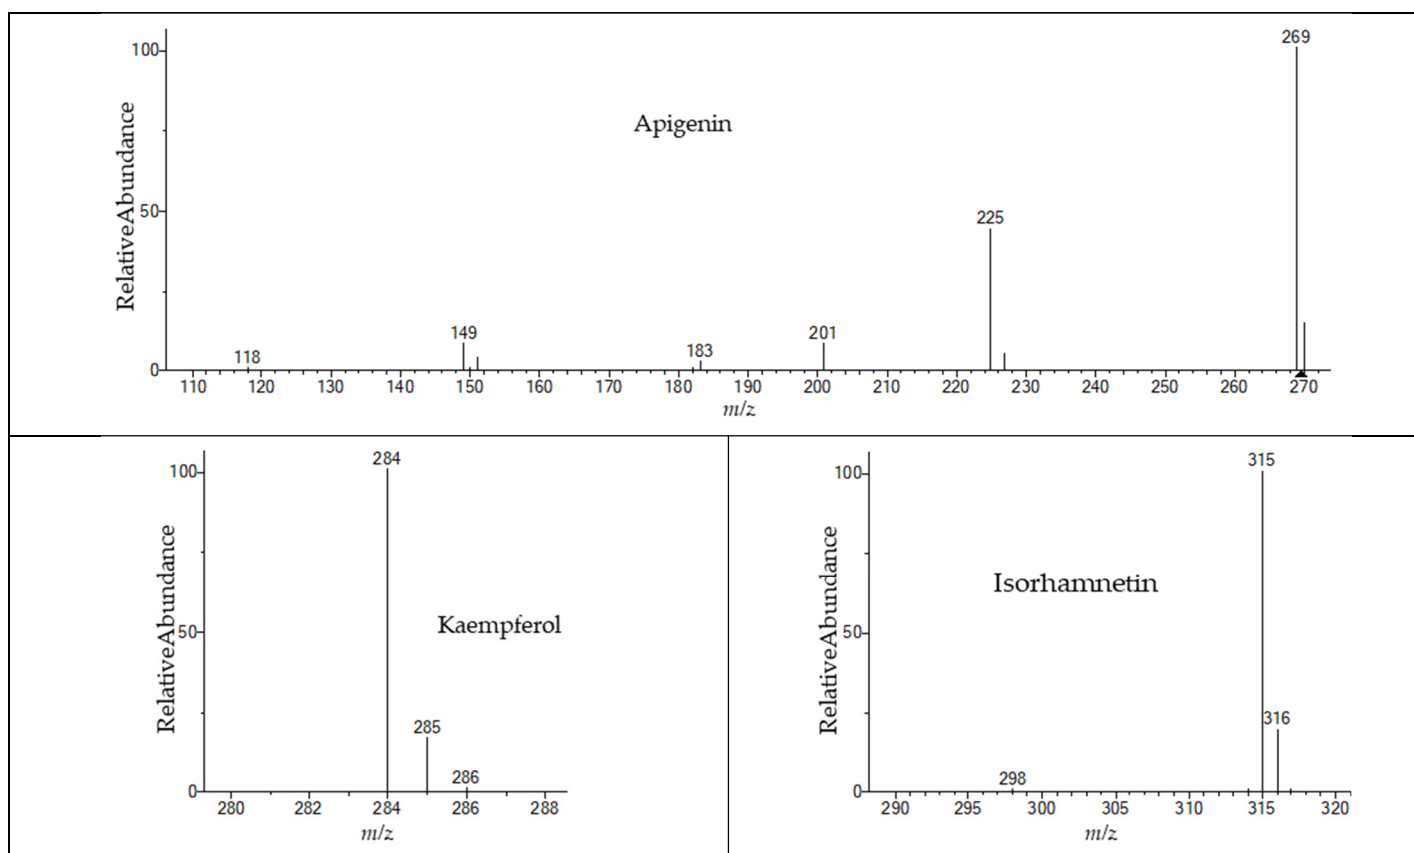

**Figure S1** (continued): ESI-MS<sup>n</sup> spectrum of the most important phenolic compounds identified in *G. lucidum*: apigenin at  $m/z$  269.22, kaempferol at  $m/z$  285.79, and Isorhamnetin at  $m/z$  316.14.

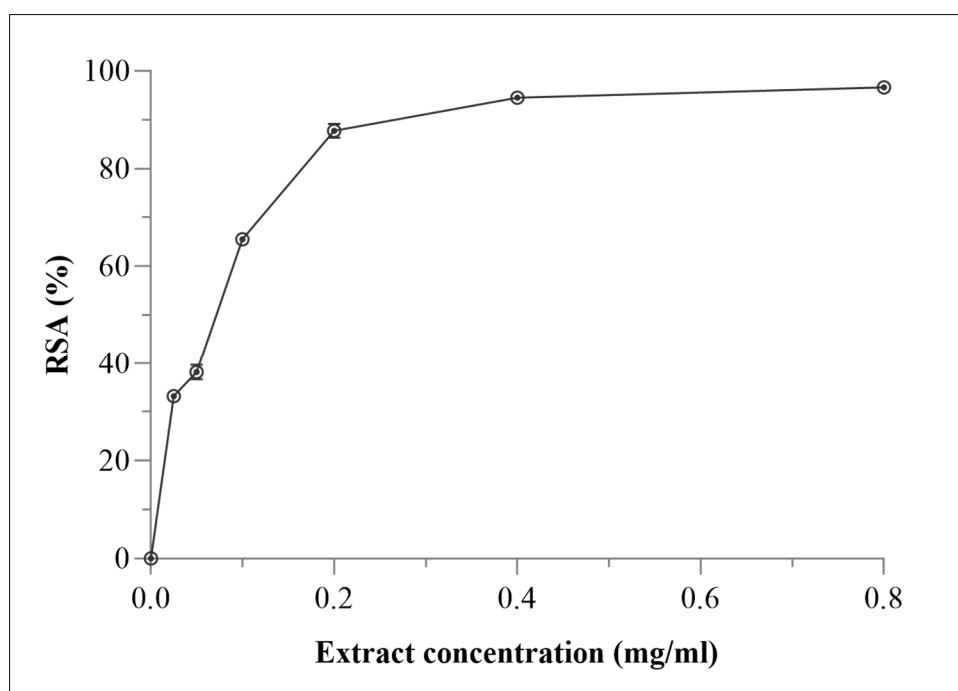

**Figure S2:** Radical-scavenging activity on DPPH radicals. Each value is expressed as mean  $\pm$  SD (n = 3).

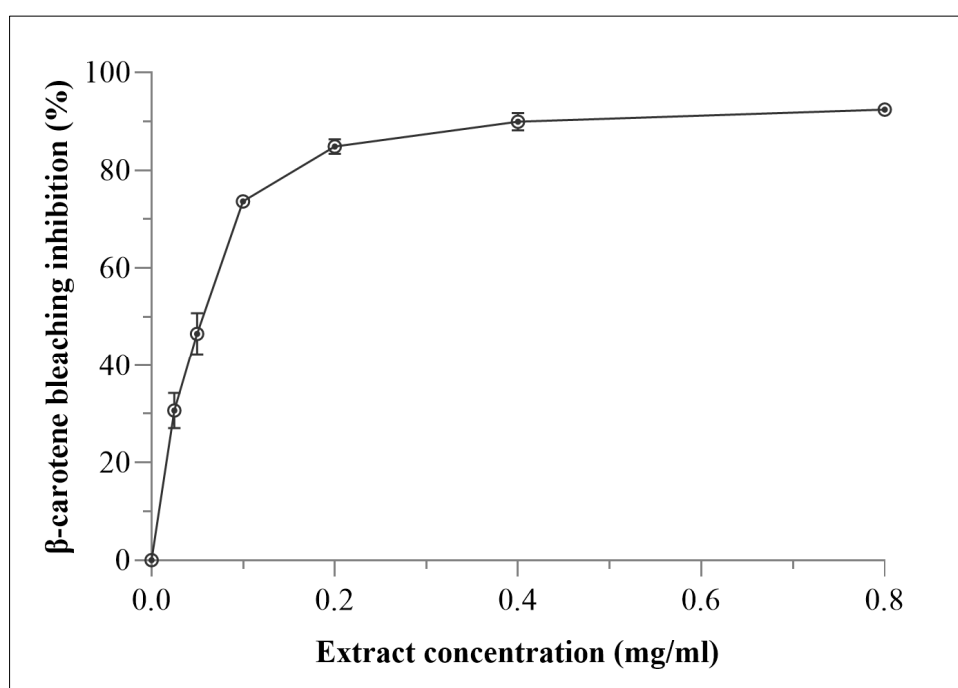

**Figure S3:** Lipid peroxidation inhibition measured by the  $\beta$ -carotene bleaching inhibition. Each value is expressed as mean  $\pm$  SD (n = 3).

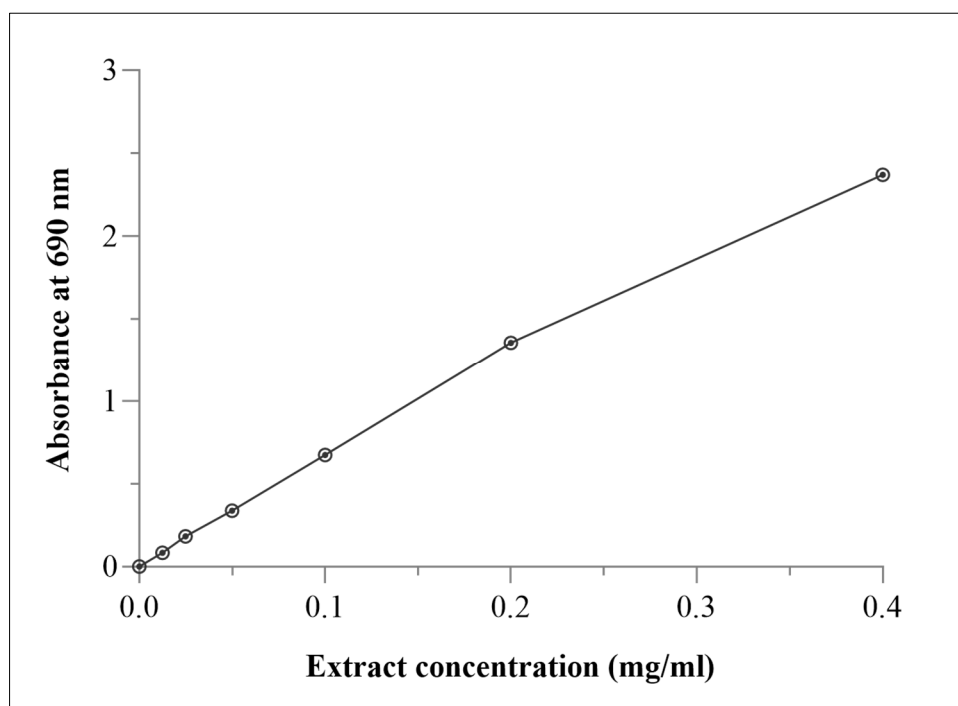

**Figure S4:** Reducing power. Each value is expressed as mean  $\pm$  SD (n = 3).
